# Supplementary material for: Functional Profiling of Transcription Factor Genes inNeurospora crassa
Source: Oxford University Press journal article supplement (doi:10.1534/g3.117.043331), 2017-07-11
Supplement: 043331_files1.pdf [file 043331_files1.pdf]

## SUPPLEMENTARY FIGURES

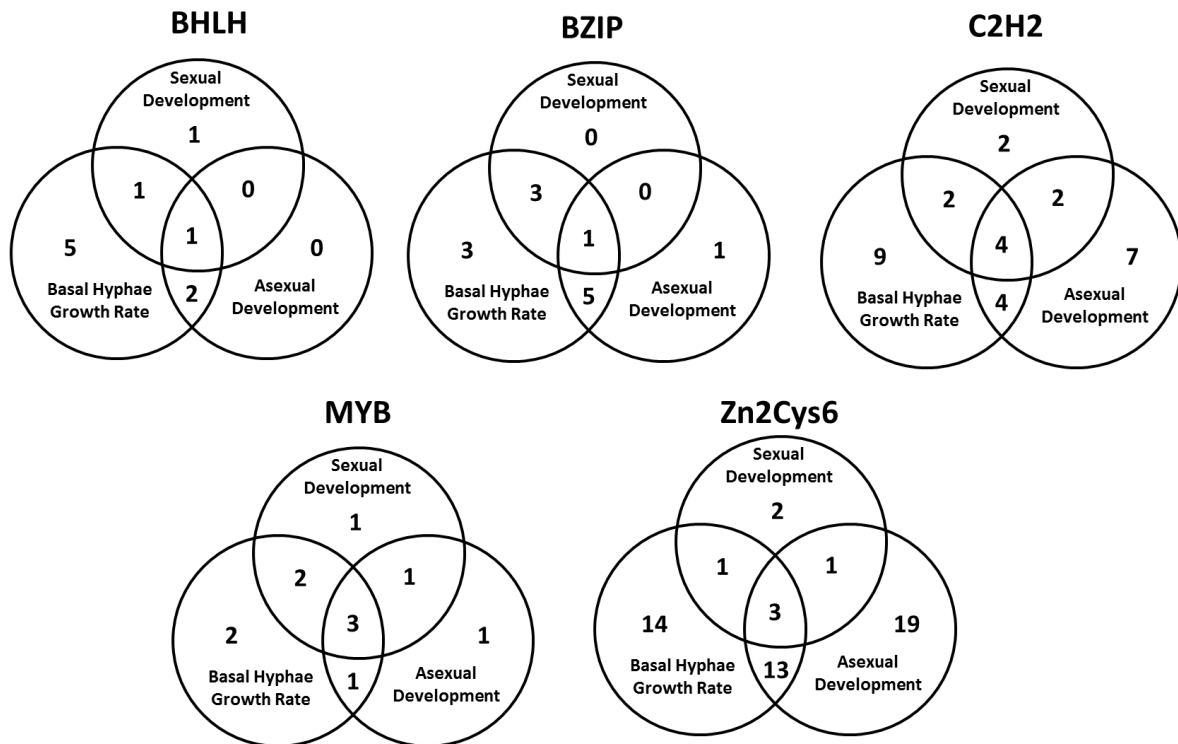

**Figure S1. Phenotype summary for major transcription factor classes.** The total number of mutants with the indicated defect or combination of defects is shown in each lobe of the Venn diagram for that transcription factor class.

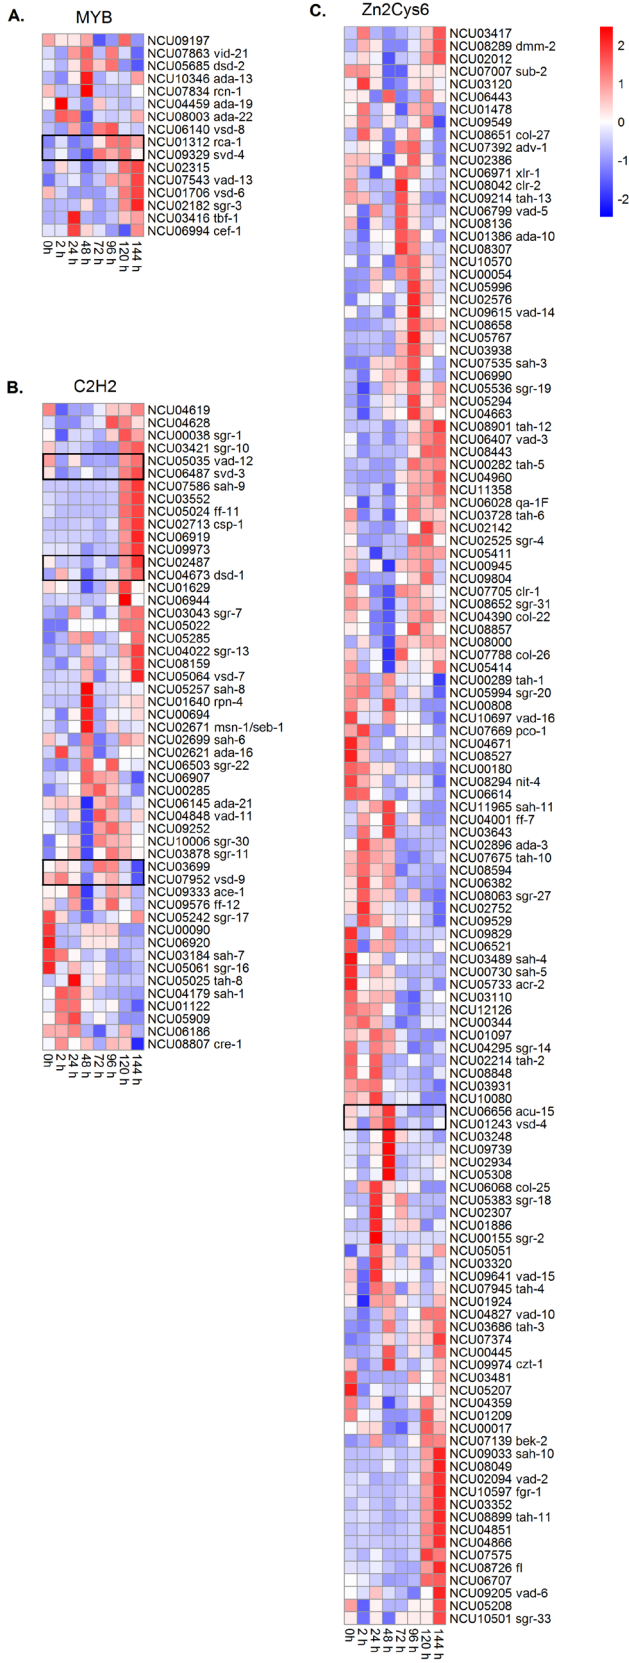

**Figure S2. Sexual development time course heat maps for MYB, C2H2 and Zn<sub>2</sub>Cys<sub>6</sub> (C6) transcription factor classes.** The clustering and heatmap analysis presented in Figure 4C was performed on all mutants in each of the displayed transcription factor classes, whether or not they had a sexual development phenotype. Boxed groups of genes include one gene with a non-blocking sexual development phenotype and another gene with no phenotype or a non-blocking defect that is similarly expressed during sexual development. The values for each gene are normalized to the RPKM at the time point with lowest expression for that gene.

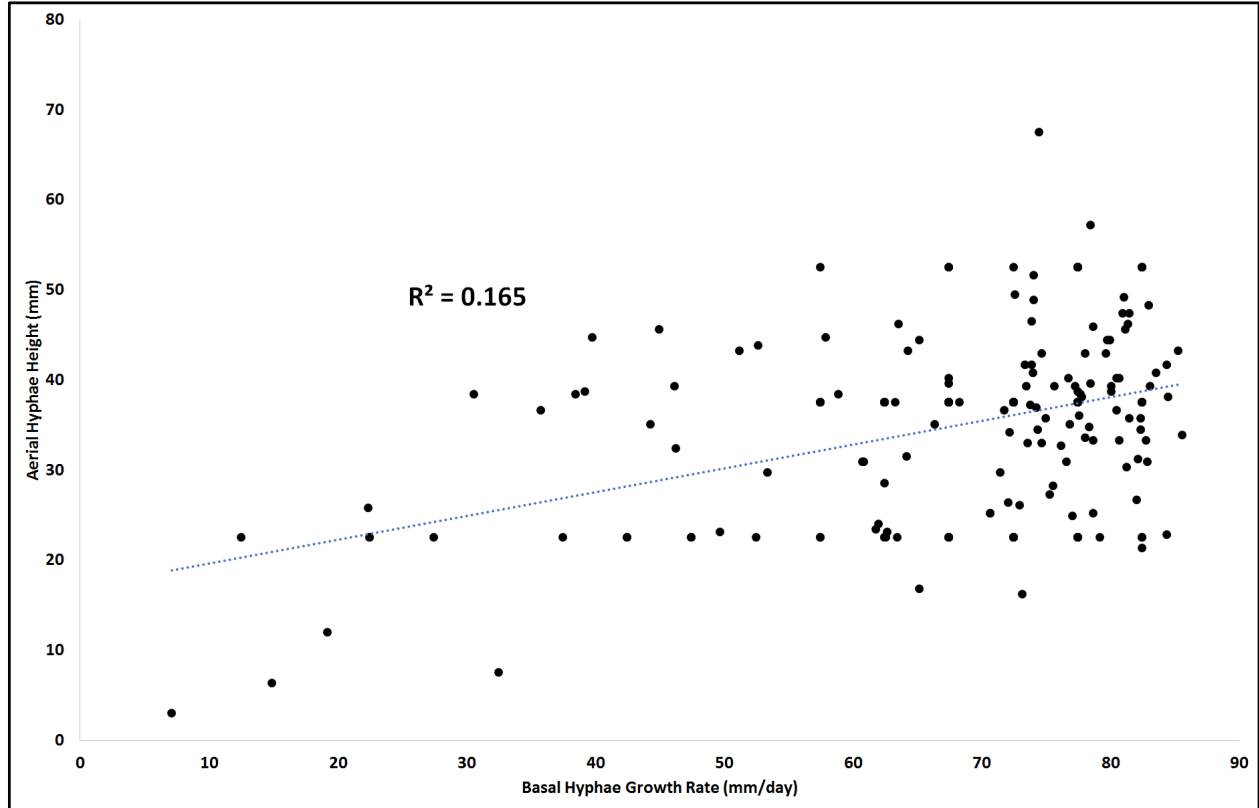

**Figure S3. Linear regression analysis of aerial hyphae height and hyphal growth rate data.** Data are taken from Figure 3C. The  $R^2$  value for the line drawn through the data has a value of 0.165.

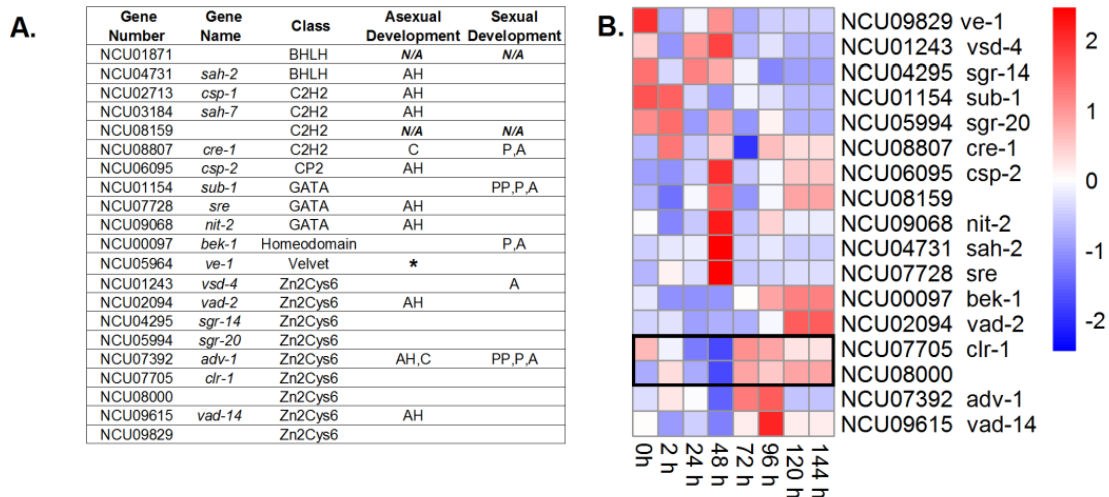

**Figure S4. Asexual/sexual sporulation phenotypes and sexual development expression data analysis for transcription factors regulated by the White Collar Complex (WCC).**

**A. Asexual and sexual development phenotype summary.** Asexual sporulation (aerial hyphae height and/or conidia production) and sexual development (protoperithecia, perithecia and ascospore production) defects for available mutants lacking 18 transcription factors that are regulated by the WCC (see (Smith et al. 2010)). \*Data supporting an asexual sporulation defect for *ve-1* mutant taken from (Bayram et al. 2008).

**B. Sexual development time course heat map.** Available RNAseq data for 17/21 transcription factor genes regulated by the WCC were subjected to clustering and heatmap analysis as described in Figure 4C. NCU0775/*clr-1* and NCU08000 (boxed) lack sexual cycle phenotypes, but are coordinately expressed during sexual development.

## References for Supplementary Figures

- Bayram, O., S. Krappmann, S. Seiler, N. Vogt, and G.H. Braus, 2008 *Neurospora crassa ve-1* affects asexual conidiation. *Fungal Genet Biol* 45 (2):127-138.
- Smith, K.M., G. Sancar, R. Dekhang, C.M. Sullivan, S. Li et al., 2010 Transcription factors in light and circadian clock signaling networks revealed by genomewide mapping of direct targets for Neurospora White Collar Complex. *Eukaryot Cell* 9 (10):1549-1556.
