# Supplementary material for: Functional Profiling of Transcription Factor Genes in Neurospora crassa
Source: G3 (Bethesda). 2017 Jul 7;7(9):2945–56. doi: 10.1534/g3.117.043331 (PMC5592922; doi:10.1534/g3.117.043331)
Supplement: Supplementary file 2 [file 2945TableS1.xlsx]

## Sheet: Table S1
Neurospora Gene Number	Fungal Genetics Stock Center (FGSC) # or Lab Stock	Mating Type	Purified from Heterokaryon?1	Locus History and Comments2	Neurospora Gene Name3	Data Source4	Transcription Factor Class5	Essential Gene?6	Basal Hyphae Growth Rate Phenotype?7	Linear Growth Rate8	Asexual Development Phenotype (AH, C)?9	Aerial Hyphae Height10	Conidia Formation on Slants	Sexual Development Phenotype? (PP, P, A)11	Protoperithecia	Perithecia	Ascospores
NCU06213	11373	mat A				Broad	APSES	No		72.5		37.5	Normal		Normal	Normal	Normal
NCU06411	11116	mat a			vad-4	Colot et al., 2006; Broad	APSES	No	R	37.5	AH,C	22.5	Reduced		Normal	Normal	Normal
NCU03356	11128	mat a				Colot et al., 2006; Broad	APSES	No		72.5		37.5	Normal		Normal	Normal	Normal
NCU07561	11114	mat a				Colot et al., 2006; Broad	APSES	No		72.5		37.5	Normal		Normal	Normal	Normal
NCU01414	No Strain	mat a	Attempted from FGSC 11730	Strain not correct; Incorrect hph insertion	asm-1	No Data	APSES	No14
NCU11215	No Strain			Not Attempted		No Data	APSES	Unknown
NCU07587	19413	mat a			vsd-5	This study	APSES	No	I	85.6		33.9	Normal	PP,P,A	Reduced number	Reduced beaks	Reduced number
NCU01954	Lab Stock	mat a	FGSC 16495		cwc-24	This study	APSES	No	R	74.7		42.9	Normal		Normal	Normal	Normal
NCU06560	20194	mat a				This study	APSES	No		83.1		39.3	Normal		Normal	Normal	Normal
NCU05891	11904	mat a			ada-20	Colot et al., 2006; Broad	ARID/BRIGHT	No	R	32.5	AH,C	7.5	Not formed	PP,P,A	Not formed	Not formed	Not formed
NCU03892	Lab Stock	mat a	FGSC 11843		sgr-12	This study	ARID/BRIGHT	No	R	66.4		35.1	Normal		Normal	Normal	Normal
NCU01238	11978	mat a			ada-9	This study	ARID+APSES	No	R	62	AH	24	Normal	P,A	Normal	Reduced size	Not formed
NCU04079	21979	mat a			svd-1	This study	ARID+MYB	No		75.3	AH	27.3	Normal	PP,P	Reduced number	Reduced number	Normal
NCU00833	16644	mat a				No Data	AT Hook	No
NCU01145	12797	mat a				No Data	AT Hook	No
NCU00749	11439	mat a			chc-1	Broad	BHLH	No	R	62.6	AH	22.5	Normal		Normal	Normal	Normal
NCU09315	11448	mat a			nuc-1	Broad	BHLH	No	R	62.5		37.5	Normal		Normal	Normal	Normal
NCU04731	11139	mat a			sah-2	Colot et al., 2006; Broad	BHLH	No	R	67.5	AH	22.5	Normal		Normal	Normal	Normal
NCU01871	No Strain	mat a	Attempted from FGSC 19222			No Data	BHLH	Unknown
NCU08999	14494	mat a			vsd-3	This study	BHLH	No	R	44.3		35.1	Normal	PP,P,A	Reduced number	Reduced number; No beaks	Not formed
NCU08184	17874	mat a			sgr-28	This study	BHLH	No	R	46.2		39.3	Normal		Normal	Normal	Normal
NCU05970	13123	mat a		NCU10284	dsd-3	This study	BHLH	No		80		44.4	Normal	P,A	Normal	Reduced beaks	Reduced number
NCU11295	17430	mat a		NCU04517 extended; NCU04517 KO deletes N-terminus of NCU11295		This study	BHLH	No		82.4		34.5	Normal		Normal	Normal	Normal
NCU00144	11340	mat a				This study	BHLH	No		80.5		40.2	Normal		Normal	Normal	Normal
NCU06744	11380	mat a			sgr-23	This study, Broad	BHLH	No	R	62.5		37.5	Normal		Normal	Normal	Normal
NCU02957	11351	mat a			ada-18	This study; Broad	BHLH	No	R	47.5	AH	22.5	Normal	PP	Reduced number	Normal	Normal
NCU02724	11349	mat a			sgr-5	This study; Broad	BHLH	No	R	73.8		37.2	Normal		Normal	Normal	Normal
NCU03077	11356	mat a			sgr-8	This study; Broad	BHLH	No	R	67.5		40.2	Normal		Normal	Normal	Normal
NCU08055	11270	mat a			idi-4	Broad	BZIP	No	R	67.5	AH	22.5	Normal		Normal	Normal	Normal
NCU00223	16028	mat a		Mislabeled as NCU00233 in Colot et al., 2006	vad-7	Broad	BZIP	No	R	67.5	AH	22.5	Normal		Normal	Normal	Normal
NCU01459	21266	mat A		Formerly asl-2	ts	Broad	BZIP	No	R	57.5		37.5	Normal	A	Normal	Normal	Abnormal, tan
NCU08744	11386	mat a			vsd-2	Broad	BZIP	No	R	57.5		37.5	Normal	P,A	Normal	Reduced number	Not formed
NCU07900	11447	mat a			sgr-26	Broad	BZIP	No	R	67.5		37.5	Normal		Normal	Normal	Normal
NCU05637	11365	mat A				Broad	BZIP	No		72.5		37.5	Normal		Normal	Normal	Normal
NCU08891	11762	mat a				Broad	BZIP	No		82.5		37.5	Normal		Normal	Normal	Normal
NCU01994	11342	mat a				Broad; This study	BZIP	No		77.7		38.4	Normal		Normal	Normal	Normal
NCU03905	11131	mat a			nap-1	Colot et al., 2006; Broad	BZIP	No		72.5		37.5	Normal		Normal	Normal	Normal
NCU00329	11119	mat a			vad-1	Colot et al., 2006; This study	BZIP	No	R	42.5	AH	22.5	Normal		Normal	Normal	Normal
NCU00499	11121	mat a			ada-1	Colot et al., 2006; This study	BZIP	No	R	27.5	AH,C	22.5	Not Formed	PP,P,A	Reduced number	Reduced number; No beaks	Not formed
NCU03536	No Strain		Attempted from FGSC 21610		cys-3	No Data	BZIP	Likely Conditional16
NCU01856	No Strain		Attempted from FGSC 22828		hac-1	No Data	BZIP	No15
NCU06965	15266	mat a				No Data	BZIP	No
NCU16494	22869	mat a		NCU11571; NCU11571 KO deletes entire NCU16494 ORF	vad-18	This study	BZIP	No	R	63.6	AH	46.2	Normal		Normal	Normal	Normal
NCU04050	21459	mat a			cpc-1	This study	BZIP	No	R	73.9		41.7	Normal	PP,P,A	Reduced number	Reduced number	Reduced number
NCU07312	21655	mat A			sgr-24	This study	BZIP	No	R	74.3		36.9	Normal		Normal	Normal	Normal
NCU07379	11383	mat a			sgr-25	This study	BZIP	No	R	62.5		37.5	Normal		Normal	Normal	Normal
NCU04058	17238	mat a			tah-7	This study	BZIP	No		81.1	AH,C	49.2	Reduced		Normal	Normal	Normal
NCU06399	14187	mat a				This study	BZIP	No		82.9		30.9	Normal		Normal	Normal	Normal
NCU01074	17482	mat A				This study	BZIP	No		84.5		38.1	Normal		Normal	Normal	Normal
NCU04211	11133	mat a				This study	BZIP	No		77.3		39.3	Normal		Normal	Normal	Normal
NCU01345	Lab Stock	mat a	FGSC 21336		asl-1	This study	BZIP	No	R	65.2	AH	16.8	Normal		Normal	Normal	Normal
NCU03421	11149	mat a			sgr-10	Broad	C2H2	No	R	62.5		37.5	Normal		Normal	Normal	Normal
NCU05242	11364	mat a			sgr-17	Broad	C2H2	No	R	67.5		37.5	Normal		Normal	Normal	Normal
NCU06503	11378	mat a			sgr-22	Broad	C2H2	No	R	57.5		37.5	Normal		Normal	Normal	Normal
NCU10006	11396	mat a			sgr-30	Broad	C2H2	No	R	67.5		37.5	Normal		Normal	Normal	Normal
NCU02713	11348	mat a			csp-1	Broad	C2H2	No		77.5	AH	22.5	Normal		Normal	Normal	Normal
NCU02699	11347	mat a			sah-6	Broad	C2H2	No		72.5	AH	22.5	Normal		Normal	Normal	Normal
NCU03184	11036	mat a			sah-7	Broad	C2H2	No		82.5	AH	22.5	Normal		Normal	Normal	Normal
NCU05257	16020	mat A			sah-8	Broad	C2H2	No		72.5	AH	22.5	Normal		Normal	Normal	Normal
NCU09333	11395	mat a			ace-1	Broad	C2H2	No		72.5		37.5	Normal		Normal	Normal	Normal
NCU06186	11370	mat a				Broad	C2H2	No		72.5		37.5	Normal		Normal	Normal	Normal
NCU06907	16009	mat a				Broad	C2H2	No		72.5		37.5	Normal		Normal	Normal	Normal
NCU00285	11118	mat a				Colot et al., 2006	C2H2	No		72.5		37.5	Normal		Normal	Normal	Normal
NCU04022	17880	mat A			sgr-13	Colot et al., 2006; Broad	C2H2	No	R	52.7		43.8	Normal		normal	normal	Normal
NCU04179	11132	mat a			sah-1	Colot et al., 2006; Broad	C2H2	No		77.5	AH	22.5	Normal		Normal	Normal	Normal
NCU00694	11103	mat a				Colot et al., 2006; Broad	C2H2	No		72.5		37.5	Normal		Normal	Normal	Normal
NCU01122	11125	mat a				Colot et al., 2006; Broad	C2H2	No		77.5		37.5	Normal		Normal	Normal	Normal
NCU03699	11130	mat a				Colot et al., 2006; Broad	C2H2	No		72.5		37.5	Normal		Normal	Normal	Normal
NCU04619	11137	mat a				Colot et al., 2006; Broad	C2H2	No		72.5		37.5	Normal		Normal	Normal	Normal
NCU04628	11138	mat A				Colot et al., 2006; Broad	C2H2	No		77.5		37.5	Normal		Normal	Normal	Normal
NCU05909	11104	mat a				Colot et al., 2006; Broad	C2H2	No		77.5		37.5	Normal		Normal	Normal	Normal
NCU06919	11106	mat a				Colot et al., 2006; Broad	C2H2	No		72.5		37.5	Normal		Normal	Normal	Normal
NCU01629	11102	mat a				Colot et al., 2006; This study	C2H2	No		77.5		37.5	Normal		Normal	Normal	Normal
NCU00090	No Strain12					No Data	C2H2	No
NCU03206	No Strain		Attempted from FGSC 11486			No Data	C2H2	Unknown
NCU03552	No Strain			Flank/Cassette PCR Failed		No Data	C2H2	Unknown
NCU05285	No Strain			Transformation Failed		No Data	C2H2	Unknown
NCU08159	No Strain			Not Attempted		No Data	C2H2	Unknown
NCU09973	No Strain12					No Data	C2H2	Unknown
NCU02621	Lab Stock	mat a	FGSC 16364		ada-16	This study	C2H2	No	R	73	AH	26.1	Normal	PP	Reduced number	Normal	Normal
NCU02671	11345	mat a			msn-1/seb-1	This study	C2H2	No	R	22.4	AH	25.8	Normal		Normal	Normal	Normal
NCU04848	16718	mat A			vad-11	This study	C2H2	No	R	73.9	AH	46.5	Normal		Normal	Normal	Normal
NCU05035	15222	mat a			vad-12	This study	C2H2	No	R	71.5	AH	29.7	Normal		Normal	Normal	Normal
NCU03975	Lab Stock	mat a	Purified from Lab Strain	NCU10679	vad-9	This study	C2H2	No	R	70.7	AH	25.2	Normal		Normal	Normal	Normal
NCU06145	12557	mat a			ada-21	This study	C2H2	No	R	45	AH,C	45.6	Reduced	PP,P,A	Reduced number	Reduced number	Reduced number
NCU08807	Lab Stock	mat a	FGSC18633		cre-1	This study	C2H2	No	R	35.8	C	36.6	Increased	P,A	Normal	Reduced number, fewer beaks	Reduced number
NCU02666	11344	mat a			ada-17	This study	C2H2	No	R	30.6	C	38.4	Reduced	PP,P,A	Reduced number	Reduced number	Reduced number
NCU05064	18573	mat a			vsd-7	This study	C2H2	No	R	65.2		44.4	Normal	A	Normal	Normal	Reduced number
NCU00038	Lab Stock	mat a	FGSC 11483		sgr-1	This study	C2H2	No	R	39.2		38.7	Normal		Normal	Normal	Normal
NCU05061	14753	mat a			sgr-16	This study	C2H2	No	R	73.5		39.3	Normal		Normal	Normal	Normal
NCU03043	11224	mat a			sgr-7	This study	C2H2	No	R	64.2		31.5	Normal		Normal	Normal	Normal
NCU06487	16019	mat A			svd-3	This study	C2H2	No		77.1	AH	24.9	Normal	A	Normal	Normal	Reduced number
NCU07586	17872	mat a			sah-9	This study	C2H2	No		82.1	AH	26.7	Normal		Normal	Normal	Normal
NCU05025	14731	mat a			tah-8	This study	C2H2	No		72.6	AH	49.5	Normal		Normal	Normal	Normal
NCU09576	13124	mat a			ff-12	This study	C2H2	No		78.7	AH,C	45.9	Reduced	PP,P,A	Reduced number	Not formed	Not formed
NCU04673	17544	mat a			dsd-1	This study	C2H2	No		76.8		40.2	Normal	A	Normal	Normal	Reduced number
NCU05024	14729	mat a			ff-11	This study	C2H2	No		78.7		33.3	Normal	P,A	Normal	Not formed	Not formed
NCU01640	11194	mat a			rpn-4	This study	C2H2	No		82.8		33.3	Normal		Normal	Normal	Normal
NCU09252	11393	mat a				This study	C2H2	No		76.9		35.1	Normal		Normal	Normal	Normal
NCU02487	17189	mat a				This study	C2H2	No		77.6		36	Normal		Normal	Normal	Normal
NCU06920	17870	mat A				This study	C2H2	No		80.1		39.3	Normal		Normal	Normal	Normal
NCU05022	17980	mat a				This study	C2H2	No		78.5		39.6	Normal		Normal	Normal	Normal
NCU06944	18039	mat a				This study	C2H2	No		79.7		42.9	Normal		Normal	Normal	Normal
NCU03878	12899	mat A			sgr-11	This study; Broad	C2H2	No	R	73.4		41.7	Normal		Normal	Normal	Normal
NCU07952	Lab Stock	mat a	FGSC 11494		vsd-9	This study	C2H2	No	R	60.8		30.9	Normal	P,A	Normal	Abnormal, fewer beaks	Reduced number
NCU02203	11883	mat a				Broad	C2H2+APSES	No		82.5		37.5	Normal		Normal	Normal	Normal
NCU00340	Lab Stock	mat a	FGSC 21335		pp-1	This study;13	C2H2+STE-like	No	R	53.4	AH,C	29.7	Increased	PP,P,A	Not formed	Not formed	Not formed
NCU02787	16226	mat A			sah-12	Broad	C2H2+Zn2Cys6	No		72.5	AH	22.5	Normal		Normal	Normal	Normal
NCU02173	11440	mat a				Broad	C2H2+Zn2Cys6	No		72.5		37.5	Normal		Normal	Normal	Normal
NCU04561	11136	mat a			mld-1	Colot et al., 2006; Broad	C2H2+Zn2Cys6	No		72.5		37.5	Normal	P	Normal	Less melanized	Normal
NCU02853	No Strain			Transformation Failed		No Data	C2H2+Zn2Cys6	Unknown
NCU09496	No Strain		Lab Strain	Inviable after Storage		No Data	C2H2+Zn2Cys6	No
NCU02017	11108	mat a			ada-2	Colot et al., 2006; Broad	CAAT Box/CBF	No	R	47.5	AH,C	22.5	Reduced	PP,P,A	Not formed	Not formed	Not formed
NCU03073	11107	mat a				Colot et al., 2006; Broad	CAAT Box/CBF	No		72.5		37.5	Normal		Normal	Normal	Normal
NCU09248	No Strain	mat a	Attempted from FGSC 11496			No Data	CAAT Box/CBF	Unknown
NCU03033	Lab Stock	mat a	FGSC 11725		sgr-6	This study	CAAT Box/CBF	No	R	38.5		38.4	Normal		Normal	Normal	Normal
NCU04773	12881	mat a				No Data	Copper Fist	No
NCU04830	No Strain			Transformation Failed		No Data	Copper Fist	Unknown
NCU06095	13564	mat a			csp-2	This study; Broad	CP2	No	R	74.5	AH	67.5	Normal		Normal	Normal	Normal
NCU05145	19281	mat a				No Data	FAR1	No
NCU06975	15351	mat a				No Data	FAR1	No
NCU06551	22381	mat a			tah-9	This study	FAR1	No		81.5	AH	47.4	Normal		Normal	Normal	Normal
NCU06173	11367	mat a			sgr-21	Broad	Forkhead	No	R	67.5		37.5	Normal		Normal	Normal	Normal
NCU08634	11384	mat a			vsd-1	This study	Forkhead	No	R	60.9		30.9	Normal	P,A	Normal	Reduced number	Not formed
NCU00019	11437	mat a			fkh-1	This study	Forkhead	No		80.5		36.6	Normal		Normal	Normal	Normal
NCU09068	11392	mat a			nit-2	Broad	GATA	No	R	62.5	AH	22.5	Normal		Normal	Normal	Normal
NCU07728	11268	mat a			sre	Broad	GATA	No	R	67.5	AH	22.5	Normal		Normal	Normal	Normal
NCU02356	11711	mat a			wc-1	Broad	GATA	No		82.5	AH	52.5	Normal		Normal	Normal	Normal
NCU01154	11127	mat a			sub-1	Colot et al., 2006; Broad	GATA	No	R	68.3		37.5	Normal	PP,P,A	Submerged	Not formed	Not formed
NCU00902	11124	mat a			wc-2	Colot et al., 2006; Broad	GATA	No		72.5	AH,C	22.5	Reduced		Normal	Normal	Normal
NCU15829	11381	mat a		Merger of NCU07039 and NCU07040; NCU07039 KO deletes 3' end of NCU15829 ORF	asd-4	This study	GATA	No	R	72.1	AH	26.4	Normal		Normal	Normal	Normal
NCU02695	11693	mat a			ada-23	Broad	HMG Box	No	R	57.5	AH	22.5	Normal	PP,P,A	Not formed	Not formed	Not formed
NCU01960	No Strain			Transformation Failed	matA-3	No Data	HMG Box	No
P3698119	No Strain				mta-1	No Data	HMG box	No
NCU09995	12345	mat a			nhp-1	Broad	HMG Box	No		72.5		37.5	Normal		Normal	Normal	Normal
NCU02326	12805	mat a				No Data	HMG Box	No
NCU02719	17411	mat a				No Data	HMG Box	No
NCU02819	No Strain		FGSC 15998 is heterokaryon			No Data	HMG Box	Unknown
NCU03126	No Strain		FGSC 15480 is heterokaryon			No Data	HMG Box	Unknown
NCU06874	20212	mat a				No Data	HMG Box	No
NCU07568	No Strain		FGSC 12813 is heterokaryon			No Data	HMG Box	Unknown
NCU09387	13451	mat a			fmf-1	This study	HMG-box	No		81.4	AH	46.2	Normal	P,A	Normal	Not formed	Not formed
NCU03593	11129	mat a			kal-1	Broad	Homeodomain	No	R	12.5	AH,C	22.5	Abnormal		Normal	Normal	Normal
NCU04353	Lab Stock	mat a	FGSC 15486			Broad	Homeodomain	No		82.4		35.7	Normal		Normal	Normal	Normal
NCU00100	15211	mat a			sah-13	Broad; This study	Homeodomain	No		79.2	AH	22.5	Normal		Normal	Normal	Normal
NCU00097	11110	mat a			bek-1	Colot et al., 2006	Homeodomain	No		72.5		37.5	Normal	P,A	Normal	No beaks	Not formed
NCU03070	11109	mat a				Colot et al., 2006; Broad	Homeodomain	No		77.5		37.5	Normal		Normal	Normal	Normal
NCU09556	19040	mat A			sgr-29	This study	Homeodomain	No	R	57.9		44.7	Normal		Normal	Normal	Normal
NCU03266	15839	mat a			ff-10	This study	Homeodomain	No		78.1		33.6	Normal	PP,P,A	Reduced size, reduced number	Not formed	Not formed
NCU02413	16195	mat a			rrg-2	Broad	HSF		R	62.5	AH	22.5	Normal		Normal	Normal	Normal
NCU08512	No Strain	mat a	Attempted from FGSC 14521		hsf-1	No Data	HSF	Yes18
NCU08480	11671	mat a		ORF extended; KO deletes N-terminus	hsf-2	This study; Broad	HSF	No	R	64.3	C	43.2	Reduced		Normal	Normal	Normal
NCU07430	No Strain			Inviable Lab Stock	mad-1	No Data	MADS-box	No
NCU02558	14182	mat a				No Data	MADS-box	No
NCU01958	No Strain			Transformation Failed	matA-1	No Data	MATalpha1	No
NCU07246	No Strain		Attempted from FGSC 21072			No Data	MBF	Unknown
NCU01706	12428	mat a			vsd-6	Broad	MYB	No	R	62.5		37.5	Normal	P,A	Normal	Not formed	Not formed
NCU01312	11208	mat a			rca-1	Broad; This study	MYB	No	R	67.5		39.6	Normal		Normal	Normal	Normal
NCU06994	No Strain		Attempted from FGSC 12184		cef-1	No Data	MYB	Unknown
NCU03416	11933	mat a			tbf-1	No Data	MYB	No
NCU07863	No Strain		Attempted from FGSC 15380		vid-21	No Data	MYB	Unknown
NCU02315	No Strain		Attempted from FGSC 13506			No Data	MYB	Unknown
NCU07543	Lab Stock	mat a	FGSC 13513		vad-13	This study	MYB	No	R	74.1	AH	48.9	Normal		Normal	Normal	Normal
NCU04459	14809	mat A			ada-19	This study	MYB	No	R	14.9	AH,C	6.3	Severely reduced	PP,P,A	Delayed	Delayed formation	Severely reduced number (also some tan)
NCU10346	Lab Stock	mat a	FGSC 15802		ada-13	This study	MYB	No	R	19.2	AH,C	12	Reduced	PP,P,A	Reduced number	Not formed	Not formed
NCU08003	Lab Stock	mat a	FGSC 21999		ada-22	This study	MYB	No	R	46.3	C	32.4	Increased	PP,P,A	Severly reduced number	Severly reduced number	Severly reduced number
NCU06140	12096	mat a			vsd-8	This study	MYB	No	R	72.2		34.2	Normal	PP,P	Reduced number	Reduced number	Normal
NCU02182	11882	mat a			sgr-3	This study	MYB	No	R	58.9		38.4	Normal		Normal	Normal	Normal
NCU09329	14814	mat a			svd-4	This study	MYB	No		78.7	AH	25.2	Normal	P,A	Normal	Reduced number	Severely reduced number
NCU07834	12075	mat a			rcn-1	This study	MYB	No		75.7	C	39.3	Reduced		Normal	Normal	Normal
NCU09197	11965	mat a				This study	MYB	No		75		35.7	Normal		Normal	Normal	Normal
NCU05685	12094	mat a			dsd-2	This study; Broad	MYB	No		77.8		38.1	Normal	PP,A	Reduced number	Normal	Reduced number
NCU03725	11308	mat a			vib-1	Broad	NDT80	No	R	52.5	AH	22.5	Normal		Normal	Normal	Normal
NCU09915	12534	mat A			fsd-1	Broad	NDT80	No		82.5		37.5	Normal	P,A	Normal	Not formed	Not formed
NCU04729	12180	mat a			sgr-15	This study	NDT80	No	R	74.4		34.5	Normal		Normal	Normal	Normal
NCU03273	13315	mat a				No Data	NFX	No
NCU06701	15895	mat A			ccr-1	This study, Broad	RFX	No		77.5		38.7	Normal		Normal	Normal	Normal
NCU07893	21090	mat A				No Data	GATA	No
NCU05964	13536	matA			ve-1	No Data	Velvet	No17
NCU09208	19659	mat a			ada-11	This study	WD40	No	R	49.7	AH	23.1	Normal	PP,P,A	Not formed	Not formed	Not formed
NCU06205	11372	mat a			rco-1	This study	WD40	No	R	7.1	AH	3	Normal	PP,P,A	Not formed	Not formed	Not formed
NCU03244	11360	mat a			sgr-9	This study	WD40	No	R	51.2		43.2	Normal		Normal	Normal	Normal
NCU09615	19000	mat a			vad-14	Broad	Zn2Cys6	No	R	63.5	AH	22.5	Normal		Normal	Normal	Normal
NCU08063	11093	mat a			sgr-27	Broad	Zn2Cys6	No	R	67.5		37.5	Normal		Normal	Normal	Normal
NCU02525	16204	mat a			sgr-4	Broad	Zn2Cys6	No	R	63.3		37.5	Normal		Normal	Normal	Normal
NCU05996	17854	mat a				Broad	Zn2Cys6	No		NA	AH	22.5	Normal	P,A	Normal	Reduced size	Not formed
NCU08042	15835	mat a			clr-2	Broad	Zn2Cys6	No		72.5	AH	22.5	Normal		Normal	Normal	Normal
NCU07669	15836	mat a			pco-1	Broad	Zn2Cys6	No		77.5	AH	22.5	Normal		Normal	Normal	Normal
NCU09033	11390	mat A			sah-10	Broad	Zn2Cys6	No		77.5	AH	22.5	Normal		Normal	Normal	Normal
NCU04001	11073	mat a			ff-7	Broad	Zn2Cys6	No		77.5		37.5	Normal	PP,P,A	Not formed	Not formed	Not formed
NCU08289	11100	mat a			dmm-2	Broad	Zn2Cys6	No		72.5		37.5	Normal		Normal	Normal	Normal
NCU00445	16385	mat a				Broad	Zn2Cys6	No		76.6		30.9	Normal		Normal	Normal	Normal
NCU04851	11089	mat a				Broad	Zn2Cys6	No		72.5		37.5	Normal		Normal	Normal	Normal
NCU01386	16373	mat a			ada-10	Broad; This study	Zn2Cys6	No	R	61.8	AH	23.4	Normal	PP,P,A	Reduced size	Not formed	Not formed
NCU00289	11085	mat a			tah-1	Colot et al., 2006	Zn2Cys6	No	R	67.5	AH	52.5	Normal		Normal	Normal	Normal
NCU00017	11075	mat a				Colot et al., 2006	Zn2Cys6	No		77.5		37.5	Normal		Normal	Normal	Normal
NCU02576	11072	mat a				Colot et al., 2006	Zn2Cys6	No		72.5		37.5	Normal		Normal	Normal	Normal
NCU02896	11070	mat a			ada-3	Colot et al., 2006; Broad	Zn2Cys6	No	R	22.5	AH	22.5	Normal	PP,P,A	Not formed	Not formed	Not formed
NCU07788	11030	mat a			col-26	Colot et al., 2006; Broad	Zn2Cys6	No	R	57.5	AH	52.5	Normal		Normal	Normal	Normal
NCU07535	11094	mat A			sah-3	Colot et al., 2006; Broad	Zn2Cys6	No	R	67.5	AH	22.5	Normal		Normal	Normal	Normal
NCU03686	11076	mat a			tah-3	Colot et al., 2006; Broad	Zn2Cys6	No	R	67.5	AH	52.5	Normal		Normal	Normal	Normal
NCU02094	11060	mat a			vad-2	Colot et al., 2006; Broad	Zn2Cys6	No	R	42.5	AH	22.5	Normal		Normal	Normal	Normal
NCU06407	11017	mat a			vad-3	Colot et al., 2006; Broad	Zn2Cys6	No	R	57.5	AH	22.5	Normal		Normal	Normal	Normal
NCU08726	11044	mat a			fl	Colot et al., 2006; Broad	Zn2Cys6	No	R	22.5	AH,C	22.5	Not formed		Normal	Normal	Normal
NCU06799	11001	mat a			vad-5	Colot et al., 2006; Broad	Zn2Cys6	No	R	62.5	AH,C	22.5	Reduced		Normal	Normal	Normal
NCU04390	11134	mat a			col-22	Colot et al., 2006; Broad	Zn2Cys6	No	R	62.5		37.5	Normal		Normal	Normal	Normal
NCU06068	11063	mat a			col-25	Colot et al., 2006; Broad	Zn2Cys6	No	R	62.5		37.5	Normal		Normal	Normal	Normal
NCU08651	11012	mat a			col-27	Colot et al., 2006; Broad	Zn2Cys6	No	R	62.5		37.5	Normal		Normal	Normal	Normal
NCU05383	11019	mat a			sgr-18	Colot et al., 2006; Broad	Zn2Cys6	No	R	57.5		37.5	Normal		Normal	Normal	Normal
NCU05536	18071	mat a			sgr-19	Colot et al., 2006; Broad	Zn2Cys6	No	R	67.5		37.5	Normal		Normal	Normal	Normal
NCU05994	11025	mat a			sgr-20	Colot et al., 2006; Broad	Zn2Cys6	No	R	67.5		37.5	Normal		Normal	Normal	Normal
NCU08652	11009	mat a			sgr-31	Colot et al., 2006; Broad	Zn2Cys6	No	R	67.5		37.5	Normal		Normal	Normal	Normal
NCU07139	11055	mat a			bek-2	Colot et al., 2006; Broad	Zn2Cys6	No		82.5	AH	52.5	Normal	P,A	Normal	No beaks	Not formed
NCU06656	11014	mat a			acu-15	Colot et al., 2006; Broad	Zn2Cys6	No		77.5	AH	52.5	Normal		Normal	Normal	Normal
NCU08294	11008	mat a			nit-4	Colot et al., 2006; Broad	Zn2Cys6	No		77.5	AH	22.5	Normal		Normal	Normal	Normal
NCU06028	11034	mat a			qa-1F	Colot et al., 2006; Broad	Zn2Cys6	No		77.5	AH	52.5	Normal		Normal	Normal	Normal
NCU08899	11048	mat a			tah-11	Colot et al., 2006; Broad	Zn2Cys6	No		77.5	AH	52.5	Normal		Normal	Normal	Normal
NCU08901	11088	mat a			tah-12	Colot et al., 2006; Broad	Zn2Cys6	No		72.5	AH	52.5	Normal		Normal	Normal	Normal
NCU02214	11069	mat a			tah-2	Colot et al., 2006; Broad	Zn2Cys6	No		77.5	AH	52.5	Normal		Normal	Normal	Normal
NCU07945	11057	mat a			tah-4	Colot et al., 2006; Broad	Zn2Cys6	No		77.5	AH	52.5	Normal		Normal	Normal	Normal
NCU09205	11096	mat a		formerly vad-6	tah-14	Colot et al., 2006; Broad	Zn2Cys6	No		82.5	AH	52.5	Normal		Normal	Normal	Normal
NCU07007	11006	mat a			sub-2	Colot et al., 2006; Broad	Zn2Cys6	No		72.5		37.5	Normal	P,A	Normal	Not formed	Not formed
NCU07705	11029	mat a			clr-1	Colot et al., 2006; Broad	Zn2Cys6	No		77.5		37.5	Normal		Normal	Normal	Normal
NCU06971	11066	mat a			xlr-1	Colot et al., 2006; Broad	Zn2Cys6	No		77.5		37.5	Normal		Normal	Normal	Normal
NCU00808	11122	mat a				Colot et al., 2006; Broad	Zn2Cys6	No		82.5		37.5	Normal		Normal	Normal	Normal
NCU00945	11064	mat a		Formerly col-20		Colot et al., 2006; Broad	Zn2Cys6	No		82.5		37.5	Normal		Normal	Normal	Normal
NCU01097	11038	mat a				Colot et al., 2006; Broad	Zn2Cys6	No		72.5		37.5	Normal		Normal	Normal	Normal
NCU01478	11002	mat a				Colot et al., 2006; Broad	Zn2Cys6	No		77.5		37.5	Normal		Normal	Normal	Normal
NCU02142	11071	mat a				Colot et al., 2006; Broad	Zn2Cys6	No		77.5		37.5	Normal		Normal	Normal	Normal
NCU02307	11054	mat a				Colot et al., 2006; Broad	Zn2Cys6	No		72.5		37.5	Normal		Normal	Normal	Normal
NCU02752	11015	mat a				Colot et al., 2006; Broad	Zn2Cys6	No		72.5		37.5	Normal		Normal	Normal	Normal
NCU02934	11003	mat a				Colot et al., 2006; Broad	Zn2Cys6	No		77.5		37.5	Normal		Normal	Normal	Normal
NCU03110	11024	mat a				Colot et al., 2006; Broad	Zn2Cys6	No		72.5		37.5	Normal		Normal	Normal	Normal
NCU03120	11036	mat a				Colot et al., 2006; Broad	Zn2Cys6	No		77.5		37.5	Normal		Normal	Normal	Normal
NCU03417	11082 or 21250	mat a				Colot et al., 2006; Broad	Zn2Cys6	No		72.5		37.5	Normal		Normal	Normal	Normal
NCU03643	11050	mat a				Colot et al., 2006; Broad	Zn2Cys6	No		72.5		37.5	Normal		Normal	Normal	Normal
NCU04359	11045	mat a				Colot et al., 2006; Broad	Zn2Cys6	No		72.5		37.5	Normal		Normal	Normal	Normal
NCU05051	11097	mat a		Formerly col-23		Colot et al., 2006; Broad	Zn2Cys6	No		82.5		37.5	Normal		Normal	Normal	Normal
NCU05294	11074	mat a				Colot et al., 2006; Broad	Zn2Cys6	No		72.5		37.5	Normal		Normal	Normal	Normal
NCU05411	11040	mat a				Colot et al., 2006; Broad	Zn2Cys6	No		77.5		37.5	Normal		Normal	Normal	Normal
NCU05767	11052	mat a				Colot et al., 2006; Broad	Zn2Cys6	No		77.5		37.5	Normal		Normal	Normal	Normal
NCU06990	11033	mat a				Colot et al., 2006; Broad	Zn2Cys6	No		72.5		37.5	Normal		Normal	Normal	Normal
NCU07374	11016	mat a				Colot et al., 2006; Broad	Zn2Cys6	No		72.5		37.5	Normal		Normal	Normal	Normal
NCU08000	11005	mat A				Colot et al., 2006; Broad	Zn2Cys6	No		77.5		37.5	Normal		Normal	Normal	Normal
NCU08049	11047	mat a				Colot et al., 2006; Broad	Zn2Cys6	No		72.5		37.5	Normal		Normal	Normal	Normal
NCU08658	11059	mat a				Colot et al., 2006; Broad	Zn2Cys6	No		72.5		37.5	Normal		Normal	Normal	Normal
NCU08848	11043	mat a				Colot et al., 2006; Broad	Zn2Cys6	No		77.5		37.5	Normal		Normal	Normal	Normal
NCU09529	11099	mat a				Colot et al., 2006; Broad	Zn2Cys6	No		72.5		37.5	Normal		Normal	Normal	Normal
NCU09549	11084	mat a				Colot et al., 2006; Broad	Zn2Cys6	No		72.5		37.5	Normal		Normal	Normal	Normal
NCU09804	11080	mat a				Colot et al., 2006; Broad	Zn2Cys6	No		77.5		37.5	Normal		Normal	Normal	Normal
NCU09829	11065	mat a				Colot et al., 2006; Broad	Zn2Cys6	No		77.5		37.5	Normal		Normal	Normal	Normal
NCU04866	11023	mat A				Colot et al., 2006; Broad	Zn2Cys6	No
NCU07392	11041	mat a			adv-1	Colot et al., 2006; This study	Zn2Cys6	No	R	62.5	AH,C	28.5	Reduced	PP,P,A	Not formed	Not formed	Not formed
NCU03489	11095	mat a		Formerly col-21	sah-4	Colot et al., 2006; This study	Zn2Cys6	No		82.5	AH	21.3	Normal		Normal	Normal	Normal
NCU08443	11061	mat a				Colot et al., 2006; This study	Zn2Cys6	No		77.5		37.5	Normal		Normal	Normal	Normal
NCU00180	12197			KO may delete promoter for NCU00179		No Data	Zn2Cys6	Unknown
NCU01886	13870	mat a				No Data	Zn2Cys6	No
NCU01924	No Strain12					No Data	Zn2Cys6	No
NCU02012	No Strain12					No Data	Zn2Cys6	No
NCU02386	14558	mat A				No Data	Zn2Cys6	No
NCU03248	14044	mat a				No Data	Zn2Cys6	No
NCU03320	No Strain12					No Data	Zn2Cys6	No
NCU03352	19465	mat a				No Data	Zn2Cys6	No
NCU03481	12754	mat a				No Data	Zn2Cys6	No
NCU03931	No Strain12					No Data	Zn2Cys6	No
NCU04663	17540	mat a				No Data	Zn2Cys6	No
NCU04671	17543	mat A				No Data	Zn2Cys6	No
NCU04960	17630	mat A				No Data	Zn2Cys6	No
NCU05208	15073	mat a		KO overlaps 3' end NCU05207		No Data	Zn2Cys6	No
NCU05414	21220	mat a				No Data	Zn2Cys6	No
NCU06324	No Strain			NCU11009 and NCU11318; NCU11009 is split into NCU06324 and NCU06325		No Data	Zn2Cys6	Unknown
NCU06521	No Strain			Transformation Failed		No Data	Zn2Cys6	Unknown
NCU06707	21379	mat A		KO may overlap promoter for NCU06708		No Data	Zn2Cys6	No
NCU08136	No Strain			Flank/Cassette PCR Failed		No Data	Zn2Cys6	Unknown
NCU08594	No Strain			Primer Design Failed		No Data	Zn2Cys6	Unknown
NCU08857	17401	mat a				No Data	Zn2Cys6	No
NCU08932	22619	mat a		ORF extended; KO deletes N-terminus		No Data	Zn2Cys6	No
NCU09739	No Strain12					No Data	Zn2Cys6	No
NCU10258	22778	mat a		Merger of NCU11359 and NCU11358; NCU11359 KO (FGSC 22778) deletes N-terminus of NCU10258		No Data	Zn2Cys6	No
NCU10570	No Strain			Transformation Failed		No Data	Zn2Cys6	Unknown
NCU12126	23395	mat a		Formerly NCU05993; NCU05993 KO deletes both NCU12125 and NCU12126		No Data	Zn2Cys6	No
NCU16667	No Strain	mat a	Attempted from FGSC 23136	NCU00217, NCU11838; NCU11838 KO deletes NCU16667 ORF		No Data	Zn2Cys6	Unknown
NCU16898	No Strain		Attempted from FGSC 23073	NCU05207, NCU11783; NCU11783 KO deletes NCU16898 ORF		No Data	Zn2Cys6	Unknown
NCU10597	15243	mat a			fgr-1	This study	Zn2Cys6	No	I	85.3		43.2	Normal		Normal	Normal	Normal
NCU04827	15838	mat a			vad-10	This study	Zn2Cys6	No	R	62.7	AH	23.1	Normal		Normal	Normal	Normal
NCU10697	21636	mat a			vad-16	This study	Zn2Cys6	No	R	70.7	AH	25.2	Normal		Normal	Normal	Normal
NCU09641	14407	mat a			vad-15	This study	Zn2Cys6	No	R	74.1	AH,C	51.6	Reduced		Normal	Normal	Normal
NCU16491	22866	mat a		NCU02768, NCU11569; NCU11569 KO deletes entire NCU16491 ORF	vad-17	This study	Zn2Cys6	No	R	73.2	AH,C	16.2	Reduced		Normal	Normal	Normal
NCU01243	18310	mat a			vsd-4	This study	Zn2Cys6	No	R	71.8		36.6	Normal	A	Normal	Normal	Reduced number
NCU04295	18855	mat a			sgr-14	This study	Zn2Cys6	No	R	74.7		33	Normal		Normal	Normal	Normal
NCU00155	15847	mat a			sgr-2	This study	Zn2Cys6	No	R	73.6		33	Normal		Normal	Normal	Normal
NCU09974	15579	mat a			czt-1	This study	Zn2Cys6	No	R	39.8		44.7	Normal		Normal	Normal	Normal
NCU10501	15241	mat a			sgr-33	This study	Zn2Cys6	No	R	74		40.8	Normal		Normal	Normal	Normal
NCU16599	23206	mat a		NCU09776, NCU11965; NCU11965 KO deletes entire NCU16599 ORF	sah-11	This study	Zn2Cys6	No		84.4	AH	22.8	Normal		Normal	Normal	Normal
NCU00730	16616	mat A			sah-5	This study	Zn2Cys6	No		75.6	AH	28.2	Normal		Normal	Normal	Normal
NCU07675	15323	mat a			tah-10	This study	Zn2Cys6	No		78.5	AH	57.18	Normal		Normal	Normal	Normal
NCU00282	12566	mat a			tah-5	This study	Zn2Cys6	No		83	AH	48.3	Normal		Normal	Normal	Normal
NCU03728	20443	mat a			tah-6	This study	Zn2Cys6	No		81.2	AH	45.6	Normal		Normal	Normal	Normal
NCU09214	21389	mat a			tah-13	This study	Zn2Cys6	No		81	AH,C	47.4	Reduced		Normal	Normal	Normal
NCU05733	18923	mat a			acr-2	This study	Zn2Cys6	No		80.7		33.3	Normal		Normal	Normal	Normal
NCU00344	Lab Stock	mat a	Purified from lab strain			This study	Zn2Cys6	No		81.3		30.3	Normal		Normal	Normal	Normal
NCU06443	22088	mat a				This study	Zn2Cys6	No		82.2		31.2	Normal		Normal	Normal	Normal
NCU00054	15837	mat A				This study	Zn2Cys6	No		76.2		32.7	Normal		Normal	Normal	Normal
NCU01209	17008	mat a				This study	Zn2Cys6	No		78.4		34.8	Normal		Normal	Normal	Normal
NCU06614	15442	mat a				This study	Zn2Cys6	No		81.5		35.7	Normal		Normal	Normal	Normal
NCU05308	18778	mat a				This study	Zn2Cys6	No		80.1		38.7	Normal		Normal	Normal	Normal
NCU10080	17448	mat a				This study	Zn2Cys6	No		80.7		40.2	Normal		Normal	Normal	Normal
NCU07575	21380	mat a				This study	Zn2Cys6	No		83.6		40.8	Normal		Normal	Normal	Normal
NCU08527	21758	mat a				This study	Zn2Cys6	No		84.4		41.7	Normal		Normal	Normal	Normal
NCU16793	23006	mat a		NCU06382, NCU11723; NCU11723 KO deletes entire NCU16793 ORF		This study	Zn2Cys6	No		78.1		42.9	Normal		Normal	Normal	Normal
NCU08307	19059	mat A				This study	Zn2Cys6	No		79.8		44.4	Normal		Normal	Normal	Normal
NCU03938	11227	mat a			aod-5	Broad	Zn2Cys6	No		82.5	AH	22.5	Normal		Normal	Normal	Normal

## Sheet: Table S1 Legend
1. Homokaryons were obtained as progeny from a sexual cross of the heterokaryon to wild type or from successive streaks of the heterokaryon on selective medium.
2. Indicates former NCU numbers for gene, split genes and fused genes. Also indicates KO mutant that was analyzed in cases of changed gene structure.
3. Gene names were taken from literature or named according to phenotypes observed during this study. ada = all development altered (defect in basal hyphae growth, asexual and sexual development); vad = vegetative growth and asexual development (defect in basal hyphae growth and asexual development); ff = female fertility; sgr = slower growth rate; fgr = faster growth rate; rcn = reduced conidiat…
4. Phenotypic data obtained from (1) Colot HV, Park G, Turner GE, Ringelberg C, Crew CM, Litvinkova L, Weiss RL, Borkovich KA, Dunlap JC. A high-throughput gene knockout procedure for Neurospora reveals functions for multiple transcription factors. Proc Natl Acad Sci U S A. 2006. 103:10352-7. Copyright 2006, National Academy of Sciences; (2) Broad Institute Neurospora Database (https://www.broadi…
5. Transcription Factor Class Abbreviations: APSES (Neurospora crassa ASM1, Saccharomyces cerevisiae Phd1p, Aspergillus nidulans StuA, Candida albicans Efg1 and S. cerevisiae Sok2p); BHLH (Basic Helix-Loop-Helix); BZIP (Basic Zipper); C2H2 (C2H2 zinc finger); HMG (High Mobility Group); HSF (Heat Shock Transcription Factor); MADS (Saccharomyces cerevisiae Mcm1p, Arabidopsis thaliana AGAMOUS, Antir…
6. Indicates whether gene is only ascospore lethal, or if viable mutant could also not be obtained from successive streaks of the knockout heterokaryon, suggesting an essential gene.
7. R = Reduced growth rate relative to wild type. I = Increased growth rate relative to wild type.
8. Wild type linear growth rates: Colot et al., 2006 and Broad Institute Neurospora Database = 70-85 mm/day. This Study = 75-85 mm/day. Binned data from Colot et al. 2006 and/or the Broad Database have been averaged to allow comparison to actual growth rate measurements.
9. AH indicates an aerial hyphae height phenotype, while C indicates a conidiation defect in slant cultures.
10. Wild type aerial hyphae height range on VM = 30-45 mm/3 days. Binned data from Colot et al. 2006 and/or the Broad Database have been averaged to allow comparison to actual aerial hyphae height measurements.
11. PP=protoperithecial defect; P=perithecial defect; A=ascospore defect
12. Existing knockout mutant at FGSC was removed from list, as it was determined to have secondary mutation that influences protoperithecial development by: Fu C, Iyer P, Herkal A, Abdullah J, Stout A, Free SJ. Identification and characterization of genes required for cell-to-cell fusion in Neurospora crassa. Eukaryot Cell. 2011 Aug;10:1100-9.
13. Sexual cycle data taken from Li D, Bobrowicz P, Wilkinson HH, Ebbole DJ. A mitogen-activated protein kinase pathway essential for mating and contributing to vegetative growth in Neurospora crassa. 2005. Genetics 170:1091-104.
14. Aramayo R, Peleg Y, Addison R, Metzenberg R. Asm-1+, a Neurospora crassa gene related to transcriptional regulators of fungal development. 1996. Genetics 144:991-1003.
15. Montenegro-Montero A, Goity A, Larrondo LF. The bZIP Transcription Factor HAC-1 Is Involved in the Unfolded Protein Response and Is Necessary for Growth on Cellulose in Neurospora crassa. 2015. PLoS One 10:e0131415.
16. Murray NE. Cysteine mutant strains of Neurospora. 1965. Genetics 52:801-8.
17. Bayram O, Krappmann S, Seiler S, Vogt N, Braus GH. Neurospora crassa ve-1 affects asexual conidiation. 2008. Fungal Genet Biol. 45:127-38.
18.Thompson S, Croft NJ, Sotiriou A, Piggins HD, Crosthwaite SK. Neurospora crassa heat shock factor 1 Is an essential gene; a second heat shock factor-like gene, hsf2, is required for asexual spore formation. 2008. Eukaryot Cell. 7:1573-81.
19. No NCU number available (sequenced strain was mat A). Uniprot accession number is shown.
